# Supplementary material for: Evaluation and management of COVID-19-related severity in people with type 2 diabetes
Source: PubMed Central journal article supplement — BMJ Open Diabetes Res Care. 2021 Sep 7;9(1):e002299. doi: 10.1136/bmjdrc-2021-002299 (PMC8424422; doi:10.1136/bmjdrc-2021-002299), 2021-09-07
Supplement: bmjdrc-2021-002299supp001.pdf [file bmjdrc-2021-002299supp001.pdf]

*Supplementary Appendix***Evaluation and Management of COVID-19-Related Severity in People with Type 2 Diabetes****Table of Contents**

|                                                                                                                                                                |          |
|----------------------------------------------------------------------------------------------------------------------------------------------------------------|----------|
| <b>APPENDIX TABLES</b> .....                                                                                                                                   | <b>2</b> |
| Table S1. ICD-10 DX codes for identification of conditions. ....                                                                                               | 2        |
| Table S2. Generics selected for each type of medication. ....                                                                                                  | 3        |
| Table S3. During the individuals' HbA1c aggregation period, the number and percentage of study participants with different HbA1c measurement frequencies. .... | 4        |

| Condition                             | ICD-10 Codes                                                                                                                                                                                                                                                                                                                                                                                                                                                                                                                                                                                                                                                                                                                                                                                                                                                                                                                                                                                                                                                                                                                                                                                                                |
|---------------------------------------|-----------------------------------------------------------------------------------------------------------------------------------------------------------------------------------------------------------------------------------------------------------------------------------------------------------------------------------------------------------------------------------------------------------------------------------------------------------------------------------------------------------------------------------------------------------------------------------------------------------------------------------------------------------------------------------------------------------------------------------------------------------------------------------------------------------------------------------------------------------------------------------------------------------------------------------------------------------------------------------------------------------------------------------------------------------------------------------------------------------------------------------------------------------------------------------------------------------------------------|
| Type 2 Diabetes                       | E11.*                                                                                                                                                                                                                                                                                                                                                                                                                                                                                                                                                                                                                                                                                                                                                                                                                                                                                                                                                                                                                                                                                                                                                                                                                       |
| COVID-19 before April 1 <sup>st</sup> | B97.29 combined with (J40.*, J22.*, J20.8, J80.*, J98.8), OR B97.29 combined with Z20.828 and (R05.*, R06.02, R50.9)                                                                                                                                                                                                                                                                                                                                                                                                                                                                                                                                                                                                                                                                                                                                                                                                                                                                                                                                                                                                                                                                                                        |
| COVID-19 after April 1 <sup>st</sup>  | U70.1                                                                                                                                                                                                                                                                                                                                                                                                                                                                                                                                                                                                                                                                                                                                                                                                                                                                                                                                                                                                                                                                                                                                                                                                                       |
| Coronary artery disease               | I25.1, I25.7                                                                                                                                                                                                                                                                                                                                                                                                                                                                                                                                                                                                                                                                                                                                                                                                                                                                                                                                                                                                                                                                                                                                                                                                                |
| Hypertension                          | I10.*-I13.*, I15.*                                                                                                                                                                                                                                                                                                                                                                                                                                                                                                                                                                                                                                                                                                                                                                                                                                                                                                                                                                                                                                                                                                                                                                                                          |
| Nephropathy                           | E10.2X, E11.2X, N00-N08, N17, N18, N19, I12, I15.0, I15.1, Q60.2, Q60.5, Q61, R80.3, R80.9                                                                                                                                                                                                                                                                                                                                                                                                                                                                                                                                                                                                                                                                                                                                                                                                                                                                                                                                                                                                                                                                                                                                  |
| Neuropathy                            | E10.4X, E11.4X, G99.0, G55, G56, G59                                                                                                                                                                                                                                                                                                                                                                                                                                                                                                                                                                                                                                                                                                                                                                                                                                                                                                                                                                                                                                                                                                                                                                                        |
| Obesity                               | DX E66.01, E66.09, E66.1, E66.2, E66.8, E66.9, Z68.30-Z68.39, Z68.41-Z68.45                                                                                                                                                                                                                                                                                                                                                                                                                                                                                                                                                                                                                                                                                                                                                                                                                                                                                                                                                                                                                                                                                                                                                 |
| Retinopathy                           | E10.3X, E11.3X, H35.X                                                                                                                                                                                                                                                                                                                                                                                                                                                                                                                                                                                                                                                                                                                                                                                                                                                                                                                                                                                                                                                                                                                                                                                                       |
| Stroke                                | G45.0, G45.1, G45.2, G45.8, G45.9, G46.0-G46.8, G97.31, G97.32, I60.00, I60.01, I60.02, I60.10, I60.11, I60.12, I60.20, I60.21, I60.22, I60.30, I60.31, I60.32, I60.4, I60.50, I60.51, I60.52, I60.6, I60.7, I60.8, I60.9, I61.0-I61.9, I63.00, I63.02, I63.011, I63.012, I63.013, I63.019, I63.02, I63.031, I63.032, I63.039, I63.09, I63.10, I63.111, I63.112, I63.119, I63.12, I63.131, I63.132, I63.139, I63.19, I63.20, I63.211, I63.212, I63.213, I63.219, I63.22, I63.231, I63.232, I63.233, I63.239, I63.29, I63.30, I63.311, I63.312, I63.313, I63.319, I63.321, I63.322, I63.323, I63.329, I63.331, I63.332, I63.333, I63.339, I63.341, I63.342, I63.343, I63.349, I63.39, I63.40, I63.411, I63.412, I63.413, I63.419, I63.421, I63.422, I63.423, I63.429, I63.431, I63.432, I63.433, I63.439, I63.441, I63.442, I63.443, I63.449, I63.49, I63.50, I63.511, I63.512, I63.513, I63.519, I63.521, I63.522, I63.523, I63.529, I63.531, I63.532, I63.533, I63.539, I63.541, I63.542, I63.543, I63.549, I63.59, I63.6, I63.8, I63.9, I66.01, I66.02, I66.03, I66.09, I66.11, I66.12, I66.13, I66.19, I66.21, I66.22, I66.23, I66.29, I66.3, I66.8, I66.9, I67.841, I67.848, I67.89, I97.810, I97.811, I97.820, I97.821 |
| Stroke (exclusion codes)              | EXCLUSION: If any of the qualifying claims have any of the following codes in any DX position then EXCLUDE: S01.*-S06.*, OR Z51.89 as the principal DX Code then EXCLUDE.                                                                                                                                                                                                                                                                                                                                                                                                                                                                                                                                                                                                                                                                                                                                                                                                                                                                                                                                                                                                                                                   |
| Intensive Care                        | CPT-4 codes 99291, 99292; HCPCS codes G0508, G0509, G9853; combined with revenue codes 200 and 202.                                                                                                                                                                                                                                                                                                                                                                                                                                                                                                                                                                                                                                                                                                                                                                                                                                                                                                                                                                                                                                                                                                                         |

**Table S1.** ICD-10 DX codes for identification of conditions.

| <b>Drug Type</b> | <b>Generics</b>                                                                                                     |
|------------------|---------------------------------------------------------------------------------------------------------------------|
| Metformin        | Metformin                                                                                                           |
| Insulin          | Insulin                                                                                                             |
| ACEIs            | Benazepril, Captopril, Enalapril, Fosinopril, Lisinopril, Moexipril, Perindopril, Quinapril, Ramipril, Trandolapril |
| ARBs             | Azilsartan, Candesartan, Eprosartan, Irbesartan, Losartan, Olmesartan, Telmisartan, Valsartan, Entresto, Byvalson   |
| Corticosteroids  | Dexamethasone, Hydrocortisone, Methylprednisolone                                                                   |

**Table S2.** Generics selected for each type of medication.

| HbA1c Measurement Frequency | N    | %     |
|-----------------------------|------|-------|
| 1                           | 2714 | 16.4% |
| 2                           | 2217 | 13.4% |
| 3                           | 2148 | 13.0% |
| 4                           | 1991 | 12.1% |
| 5                           | 1831 | 11.1% |
| 6                           | 1598 | 9.7%  |
| 7                           | 1187 | 7.2%  |
| 8                           | 955  | 5.8%  |
| 9                           | 709  | 4.3%  |
| ≥ 10                        | 1154 | 7.0%  |

**Table S3.** During the individuals' HbA1c aggregation period, the number and percentage of study participants with different HbA1c measurement frequencies.
